# Supplementary material for: Stability of carboxyl-functionalized carbon black nanoparticles: the role of solution chemistry and humic acid
Source: Royal Society of Chemistry journal article supplement (doi:10.1039/c6en00530f), 2017-01-01
Supplement: c6en00530f1.pdf [file c6en00530f1.pdf]

## Supplementary Information

### Stability of carboxyl-functionalized carbon black nanoparticles: the role of solution chemistry and humic acid

Yosep Han<sup>a,†</sup>, Gukhwa Hwang<sup>a,†</sup>, Soyeon Park<sup>a</sup>, Allan Gomez-Flores<sup>a</sup>, Eunhye Jo<sup>b</sup>, Ig-Chun Eom<sup>b</sup>, Meiping Tong<sup>c</sup>, Hye-Jin Kim<sup>d</sup>, Hyunjung Kim<sup>a,\*</sup>

<sup>a</sup>Department of Mineral Resources and Energy Engineering, Chonbuk National University,  
Jeonju, Jeonbuk 54896, Republic of Korea

<sup>b</sup>Risk Assessment Division, National Institute of Environmental Research, Hwangyeong-ro  
42, Seo-gu, Incheon 404-708, Republic of Korea

<sup>c</sup>The Key Laboratory of Water and Sediment Sciences, Ministry of Education, College of  
Environmental Sciences and Engineering, Peking University, Beijing 100871, PR China

<sup>d</sup>Chemical Research Division, Environmental Health Research Department, National Institute  
of Environmental Research, Hwangyong-ro 42, Seo-gu, Incheon, 22689 Republic of Korea

**NUMBER OF PAGES: 11**

**NUMBER OF TABLES: 1**

**NUMBER OF FIGURES: 5**

---

\* Corresponding author: Tel: +82632702370; Fax: +82632702366; E-mail address:  
kshjkim@jbnu.ac.kr † These authors equally contributed to this manuscript.

## Contents

Additional Details on Materials and Methods

Additional Details on Results and Discussion

**Table S1.** Adsorption amount of SRHA onto CB-NPs suspended in NaCl (ionic strength = 0.1, 1, and 10 mM) and CaCl<sub>2</sub> (ionic strength = 0.1 and 1 mM) solutions supplemented with 1 and 5 mg/L SRHA at circumneutral pH 6.0. Error bars represent standard deviations from replicate experiments (n=5).

**Figure S1.** UV/Vis calibration curve of SRHA solution at a wavelength of 254 nm

**Figure S2. (a)** The nitrogen adsorption-desorption isotherm and **(b)** the specific surface area of the carboxyl-functionalized CB-NPs determined by a nitrogen adsorption branch using BET method

**Figure S3.** TGA profiles for bare and carboxyl-functionalized CB-NPs

**Figure S4.** Change of sedimentation of CB-NPs by ionic strength in NaCl solutions with 1 mg/L SRHA at circumneutral pH 6.0. Ionic strength varied from 0.1 to 10 mM. The Y-axis ( $A/A_0$ ) represents the normalized concentration of the CB-NPs (the number of CB-NPs at a certain time  $t$ , divided by the total number at  $t=0$ ). The particle concentration in the suspension at  $t=0$  was 10 mg/L. Average values of three replicates are presented, and error bars indicate one standard deviation.

**Figure S5.** Calculated classical DLVO interaction energy profiles for NPs–NPs systems in (a and b) NaCl (ionic strength = 0.1–10 mM) and (c and d) CaCl<sub>2</sub> (ionic strength = 0.01–1 mM) solutions with (a and c) 1 and (b and d) 5 mg/L SRHA, at circumneutral pH 6.0.

## **Additional Details on Materials and Methods**

### **SRHA Adsorption Tests**

SRHA adsorption isotherms were obtained using a batch equilibrium technique at room temperature. The initial concentrations of SRHA in the glass reactor were 1 mg/L and 5 mg/L. The mass dosage of CB-NPs added in glass reactors was 10 mg. The glass reactors were placed on a magnetic stirrer (MS2024, Misung Scientific Co., LTD, South Korea) and stirred again for 1 h. The supernatant was filtered using a syringe filter (pore size=20 nm) and the filtered supernatant was analyzed by UV/Vis spectrophotometer analysis. To investigate the reliability of the method for separating the nanoparticles from the suspended SRHA, the presence of the particles in the filtered supernatant was confirmed using TEM and a UV/Vis spectrophotometer (in the range of 200-650 nm) [1]. No particles were observed in TEM, and no peak intensity was observed in UV/Vis spectrophotometer measurements. The adsorbed SRHA content by CB-NPs was calculated directly by the difference in mass determined by the calibration curve (Fig. S1) that was obtained at the optical absorbance of 254 nm using SRHA prepared according to the protocols in references [2, 3].

## **Additional Details on Results and Discussion**

### **Adsorption of SRHA on CB-NPs in NaCl and CaCl<sub>2</sub> Solutions**

The amount of SRHA adsorbed into the CB-NPs in the representative ionic strength conditions of NaCl and CaCl<sub>2</sub> solutions was measured, and the results are shown in Table S1. The SRHA adsorption was greater in the CaCl<sub>2</sub> solution than in the NaCl solution. In the latter, the adsorption amount was constant at approximately 4.11 to 5.97 mg-SRHA/g-CB-

NPs, regardless of the concentration of SRHA added and the ionic strength. In the  $\text{CaCl}_2$  solution, however, the SRHA adsorption amount increased with the increase in the ionic strength. More precisely, the amount of SRHA adsorbed into CB-NPs was approximately 18.06 mg-SRHA/g-CB-NPs when 1 mg/L SRHA was added to 1 mM  $\text{CaCl}_2$  solution, and the adsorption amount increased up to 35.10 mg-SRHA/g-CB-NPs when the SRHA concentration (5 mg/L SRHA) was high. According to recent studies, the humic acid adsorption onto the nanomaterial surface is attributable to three mechanisms. The first mechanism relies on the uniquely high specific surface area of the NPs, which provides humic acid with a large adsorption space [4, 5]. The second mechanism is the access of the humic acid molecules to the sites that have low levels of hydrophilicity and low negative charge on the particle surface [6]. Finally, the humic acid adsorption occurs because of the electrostatic attraction and ligand-exchange reactions between humic acid and nanomaterials [5, 7]. According to the zeta potential results, a positive charge was confirmed in the  $\text{CaCl}_2$  solution at high ionic strength, unlike the negative charge of the CB-NP surface in the NaCl solution. Additionally, the charge positively increased with the increasing ionic strength of the  $\text{CaCl}_2$  solution. In the  $\text{CaCl}_2$  solution, an electrostatic attractive force is present between CB-NPs and SRHA at high ionic strength. Consequently, more SRHA adsorption was induced than in NaCl at same ionic strength. This assumption was indirectly supported by the experiments that confirmed the negative reversal of CB-NP zeta potential at high ionic strength in the presence of SRHA in the  $\text{CaCl}_2$  solution (Table 2, Table S1, and Fig. 7(b)).

## References

- [1] B. Bolto, D. Dixon, R. Eldridge and S. King, *Water Research*, 2001, **35**, 2669-2676.
- [2] N. Akaighe, S. W. Depner, S. Banerjee, V. K. Sharma and M. Sohn, *Science of the Total Environment*, 2012, **441**, 277-289.
- [3] G. Chen, X. Liu and C. Su, *Environmental science & technology*, 2012, **46**, 7142-7150.
- [4] S. Kang and B. Xing, *Langmuir*, 2008, **24**, 2525-2531.
- [5] B. Gu, J. Schmitt, Z. Chen, L. Liang and J. F. McCarthy, *Environ Sci Technol*, 1994, **28**, 38-46.
- [6] K. Yang, D. Lin and B. Xing, *Langmuir*, 2009, **25**, 3571-3576.
- [7] Y. Han, D. Kim, G. Hwang, B. Lee, I. Eom, P. J. Kim, M. P. Tong and H. Kim, *Colloid Surface A*, 2014, **451**, 7-15.

**Table S1.** Adsorption amount of SRHA onto CB-NPs suspended in NaCl (ionic strength = 0.1, 1, and 10 mM) and CaCl<sub>2</sub> (ionic strength = 0.1 and 1 mM) solutions supplemented with 1 and 5 mg/L SRHA at circumneutral pH 6.0. Error bars represent standard deviations from replicate experiments (n=5).

|                   |                  | <b>Ionic strength (mM)</b> | <b>Q (mg-SRHA/g-CB-NPs)</b> |
|-------------------|------------------|----------------------------|-----------------------------|
| NaCl              | w/ SRHA (1 mg/L) | 0.1                        | 4.11±0.30                   |
|                   |                  | 1                          | 4.43±0.64                   |
|                   |                  | 10                         | 4.84±0.65                   |
|                   | w/ SRHA (5 mg/L) | 0.1                        | 5.97±0.85                   |
|                   |                  | 1                          | 5.11±0.25                   |
|                   |                  | 10                         | 5.41±0.60                   |
| CaCl <sub>2</sub> | w/ SRHA (1 mg/L) | 0.1                        | 16.54±1.25                  |
|                   |                  | 1                          | 18.06±1.53                  |
|                   | w/ SRHA (5 mg/L) | 0.1                        | 28.52±0.80                  |
|                   |                  | 1                          | 35.10±1.55                  |

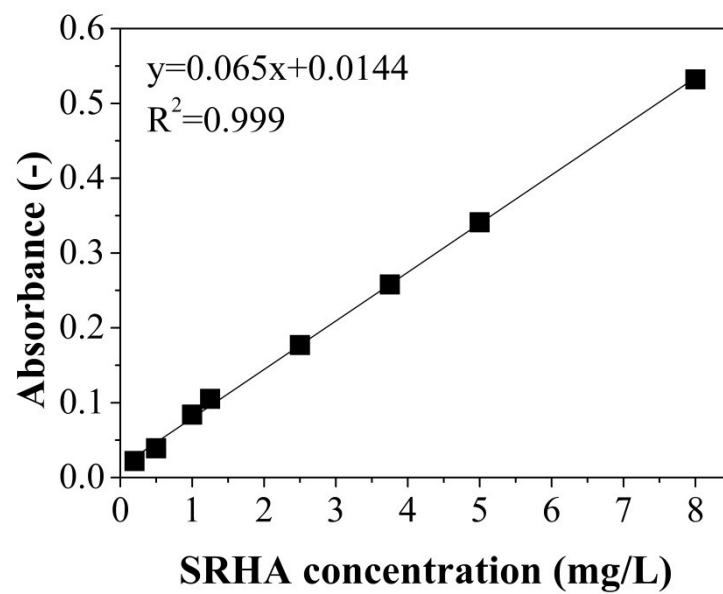

**Figure S1.** UV/Vis calibration curve of SRHA solution at a wavelength of 254 nm

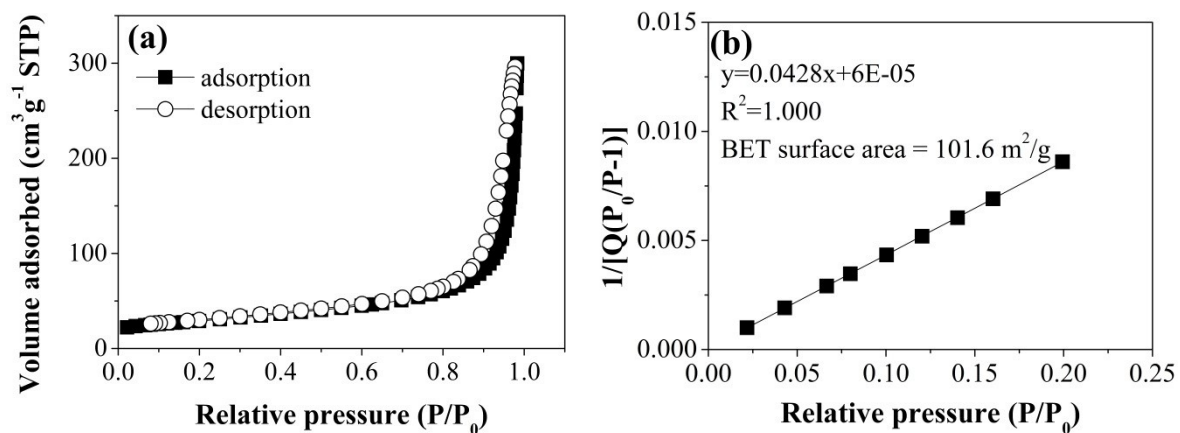

**Figure S2.** (a) The nitrogen adsorption-desorption isotherm and (b) the specific surface area of the carboxyl-functionalized CB-NPs determined by a nitrogen adsorption branch using BET method



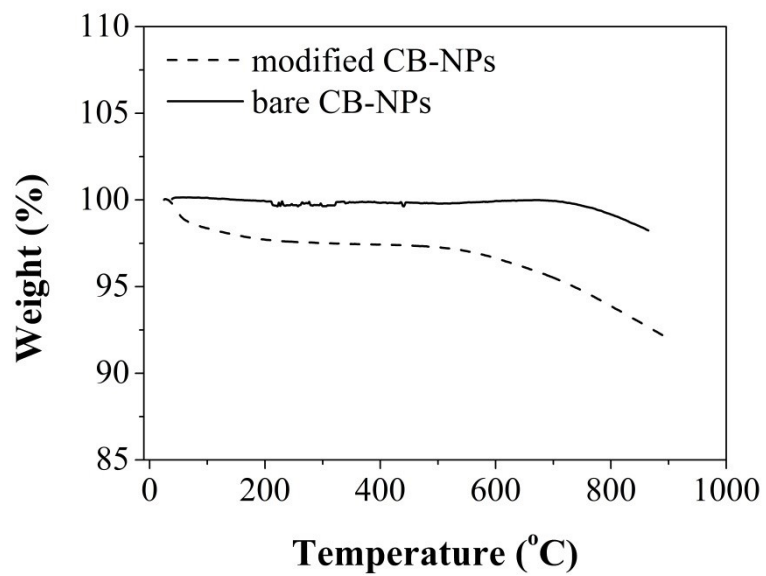

**Figure S3.** TGA profiles for bare and carboxyl-functionalized CB-NPs

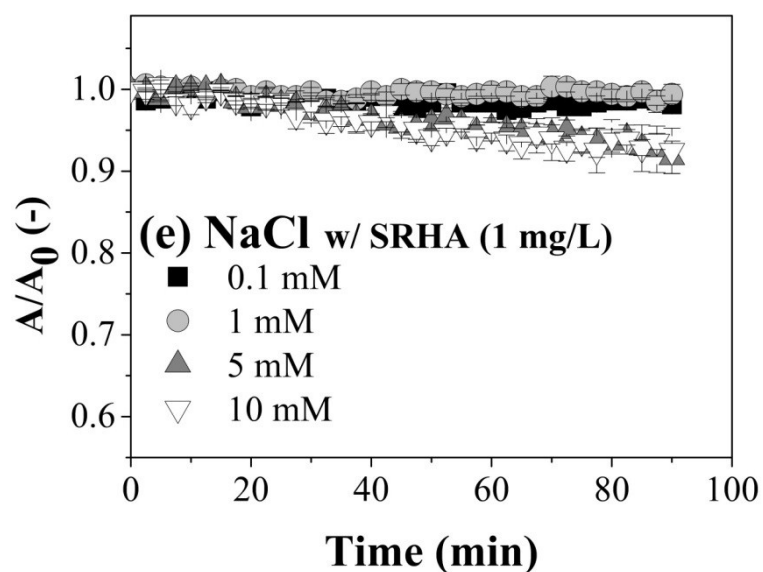

**Figure S4.** Change of sedimentation of CB-NPs by ionic strength in NaCl solutions with 1 mg/L SRHA at circumneutral pH 6.0. Ionic strength varied from 0.1 to 10 mM. The Y-axis ( $A/A_0$ ) represents the normalized concentration of the CB-NPs (the number of CB-NPs at a certain time  $t$ , divided by the total number at  $t=0$ ). The particle concentration in the suspension at  $t=0$  was 10 mg/L. Average values of three replicates are presented, and error bars indicate one standard deviation.

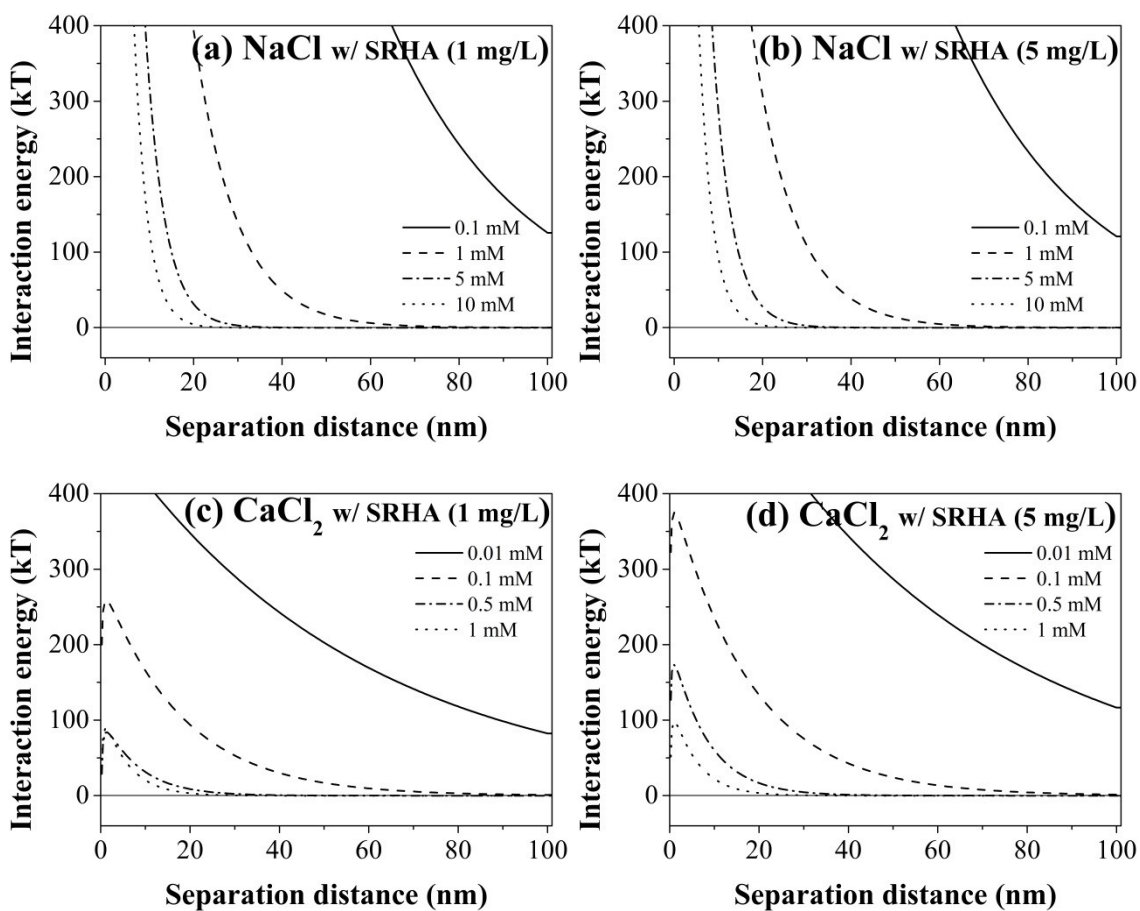

**Figure S5.** Calculated classical DLVO interaction energy profiles for NPs–NPs systems in (a and b) NaCl (ionic strength = 0.1–10 mM) and (c and d)  $CaCl_2$  (ionic strength = 0.01–1 mM) solutions with (a and c) 1 and (b and d) 5 mg/L SRHA, at circumneutral pH 6.0.
